# Supplementary material
Source: PubMed Central journal article supplement (PMC5344712)
Supplement: NIHMS843362-supplement-Supporting_Information.pdf [file NIHMS843362-supplement-Supporting_Information.pdf]

1 **Supporting Information**

2

3

4 **SI Materials and Methods**

5

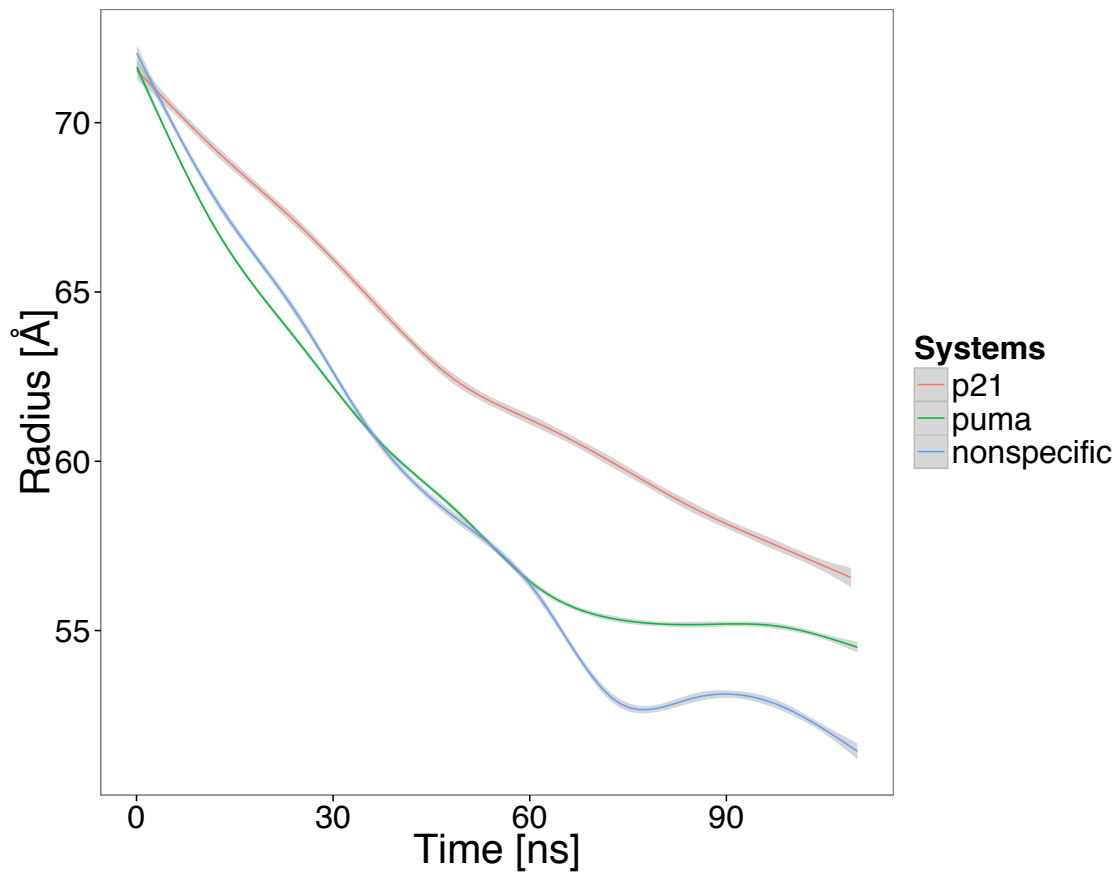

6

7

8

Supplementary Figure 1. Time evolution of the radius of gyration for the fl-p53.

9

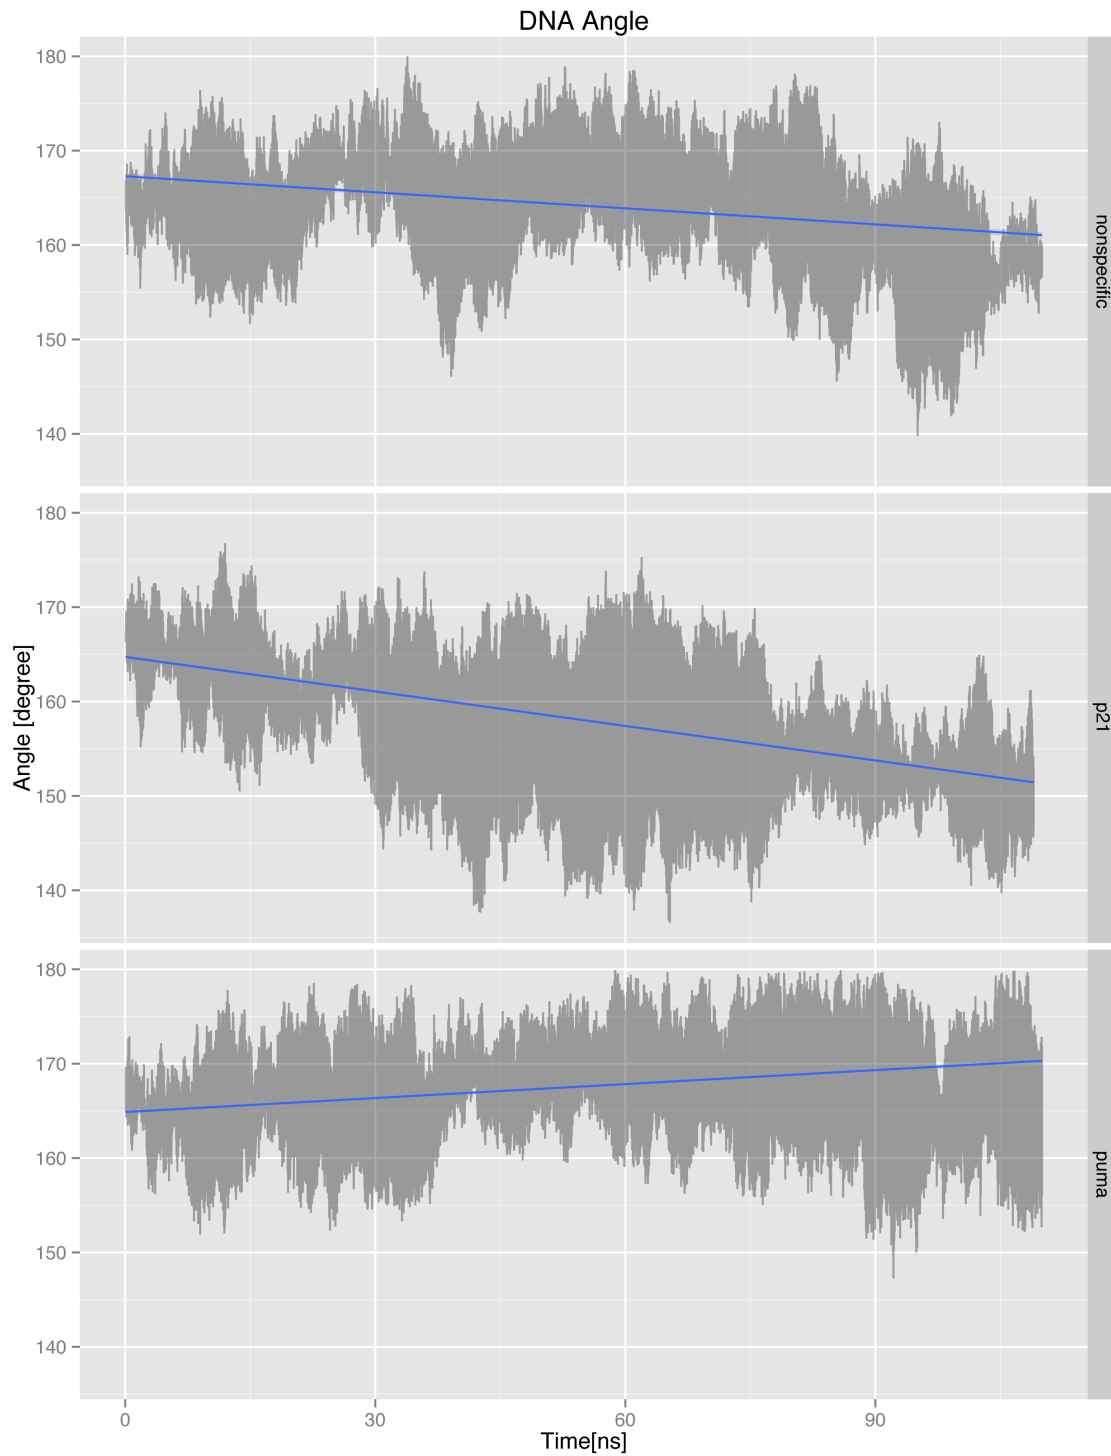

10  
11  
12  
13  
14  
15  
16

**Supplementary Figure 2. Time evolution of the DNA bending angle in the three systems.** The DNA bending angles of all three MD copies are combined and shown in dark gray. Blue Linear regression lines are drawn to show the bending trend for all copies of each system.

### p21 L1 RMSD

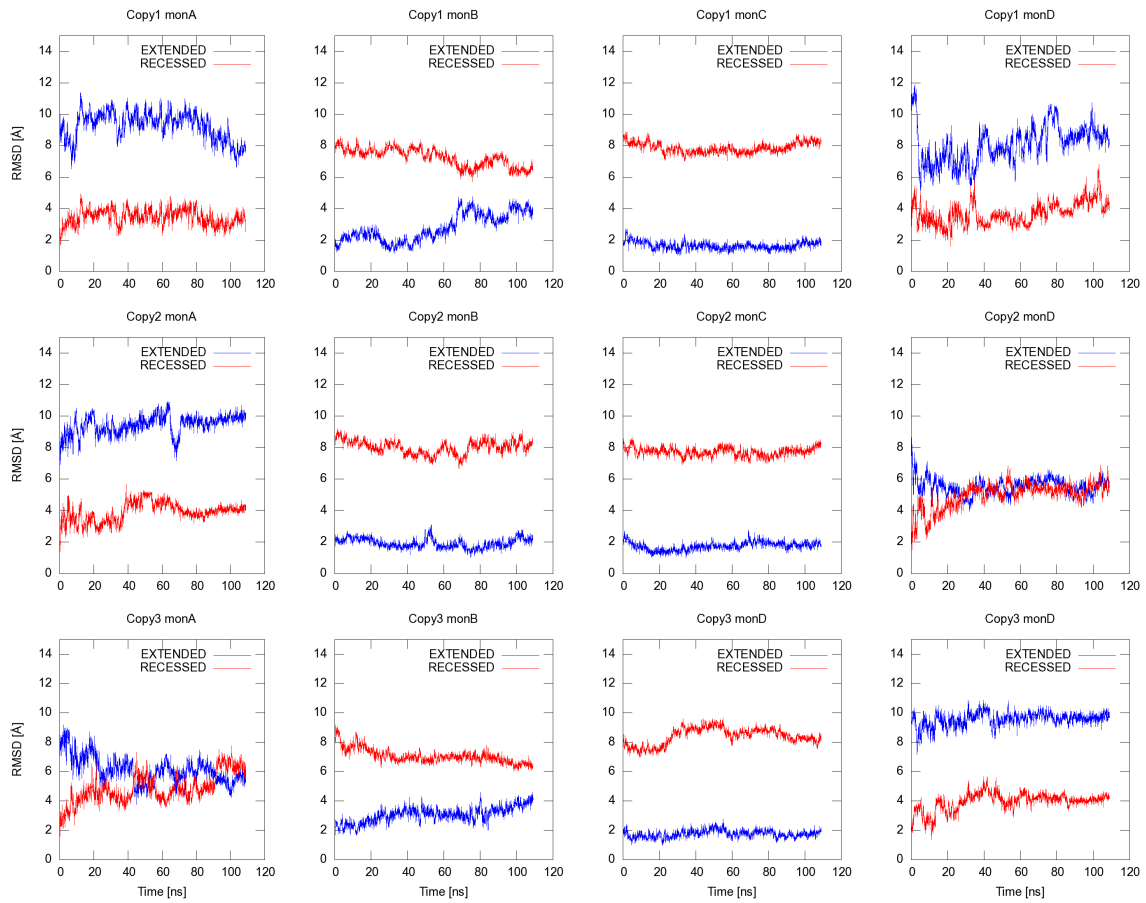

17  
18  
19  
20  
21  
22  
23  
24

**Supplementary Figure 3. L1 loop RMSD with respect to extended and recessed loop conformations in the p21 RE system.** Time evolution of the rmsd of the L1 loop (of each p53 monomer in each MD copy) calculated with respect to both the extended and the recessed L1 loop conformations. The rmsd values calculated with respect to the extended and recessed L1 conformations are colored in blue and red, respectively.

## Puma L1 RMSD

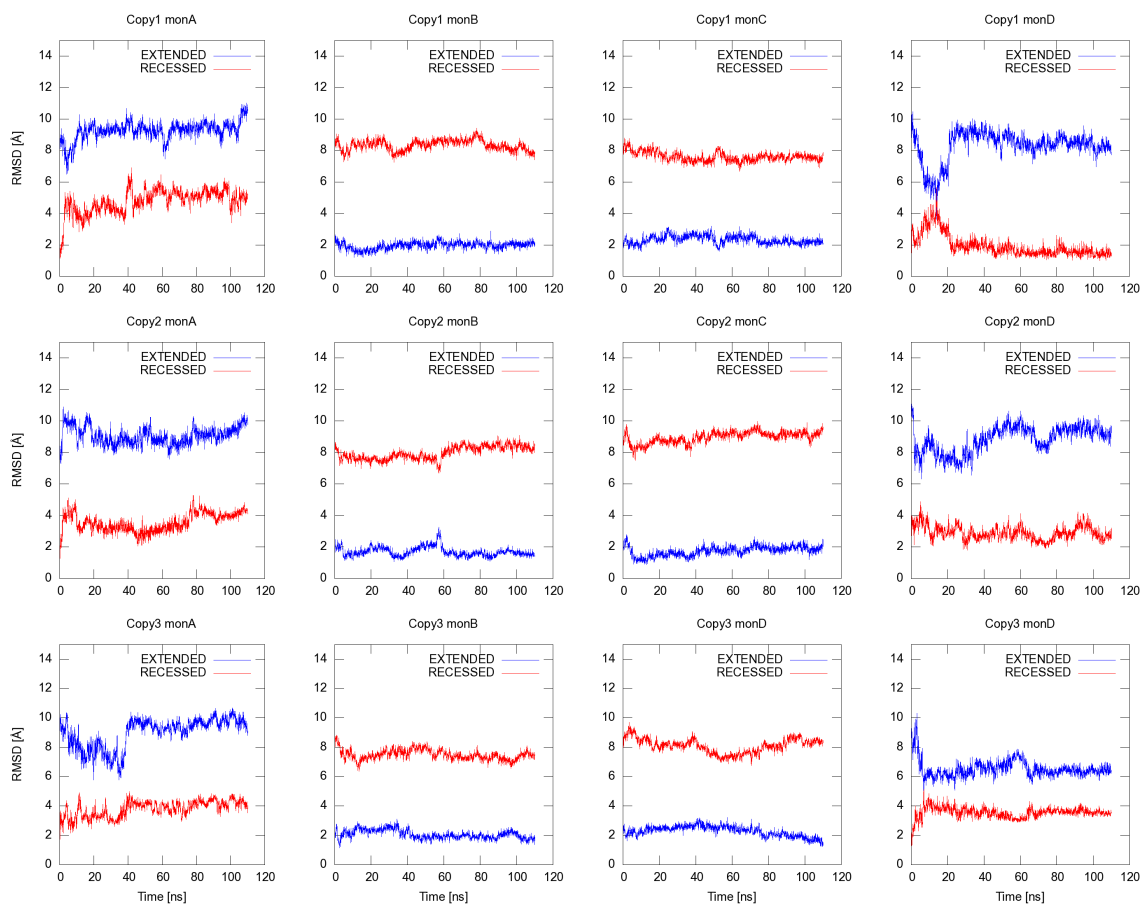

25  
26

27 **Supplementary Figure 4. L1 loop RMSD with respect to extended and recessed loop**  
28 **conformations in the puma RE system.** Time evolution of the rmsd of the L1 loop (of  
29 each p53 monomer in each MD copy) calculated with respect to both the extended and  
30 the recessed L1 loop conformations. The rmsd values calculated with respect to the  
31 extended and recessed L1 conformations are colored in blue and red, respectively.

## Nonspecific L1 RMSD

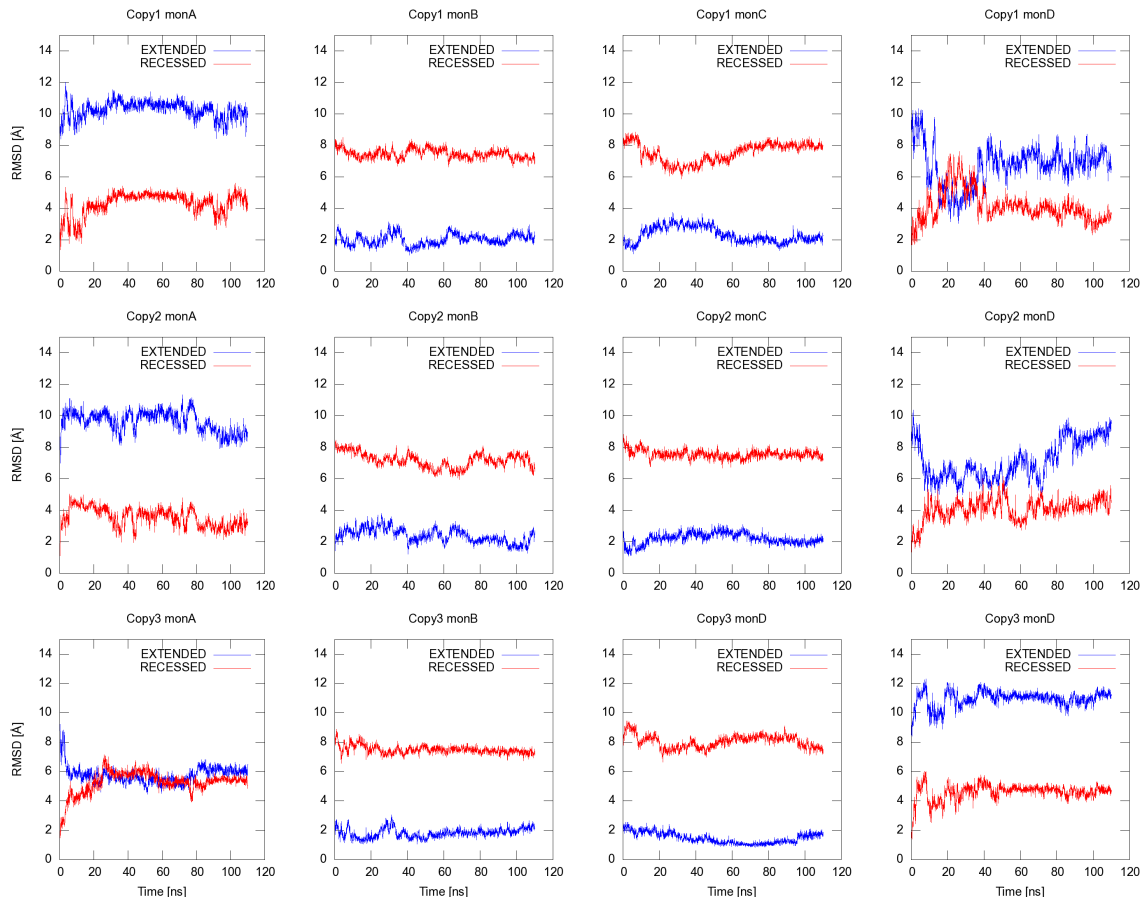

32  
33  
34  
35  
36  
37  
38  
39  
40

**Supplementary Figure 5. L1 loop RMSD with respect to extended and recessed loop conformations in the nonspecific DNA system.** Time evolution of the rmsd of the L1 loop (of each p53 monomer in each MD copy) calculated with respect to both the extended and the recessed L1 loop conformations. The rmsd values calculated with respect to the extended and recessed L1 conformations are colored in blue and red, respectively.

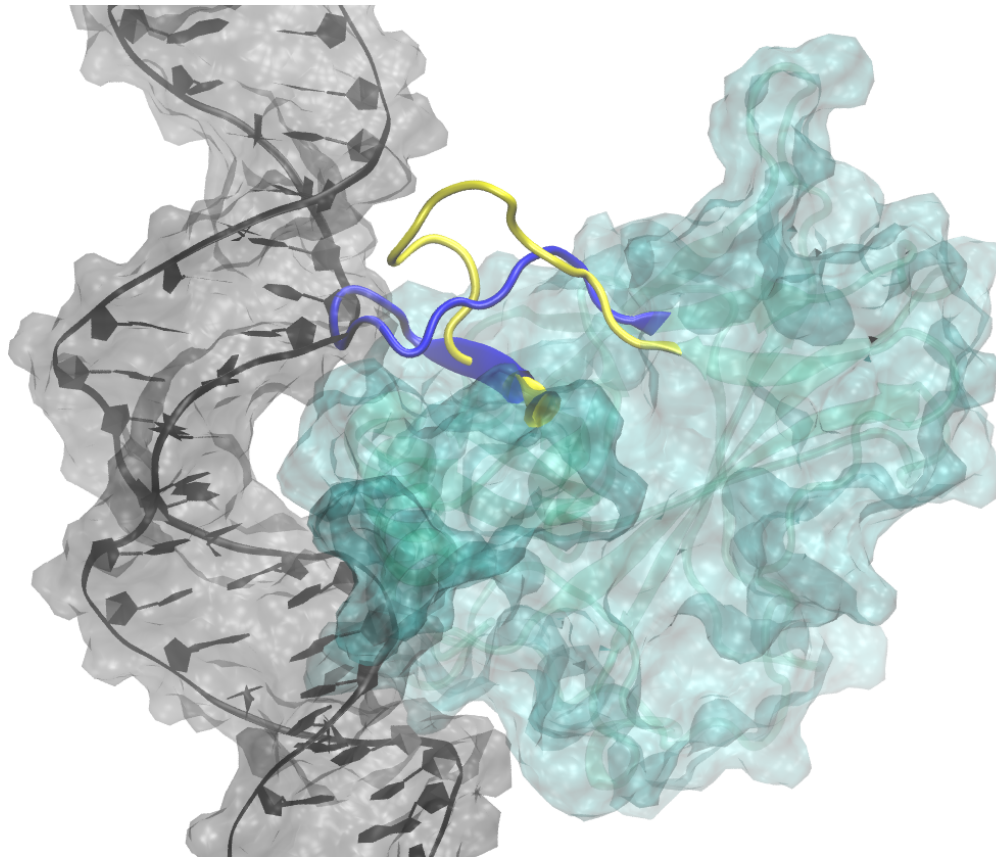

41  
42  
43  
44  
45  
46  
47  
48  
49  
50  
51  
52

**Supplementary Figure 6. Extended L1 Loop steric clash with the DNA in the outer monomer.** The extended L1 loop conformation is superimposed onto an outer DBD monomer, which usually adopted a recessed L1 loop conformation. Only one monomer surface is shown in cyan. The native recessed L1 loop conformation is colored yellow while the superimposed extended L1 loop conformation is colored blue. The DNA is drawn in gray surface and the backbone is shown in ribbon representation. The blue extended L1 loop conformation overlaps with the DNA as shown in the above figure, indicating an unfavorable steric clash that will force the L1 loop to a recessed conformation.

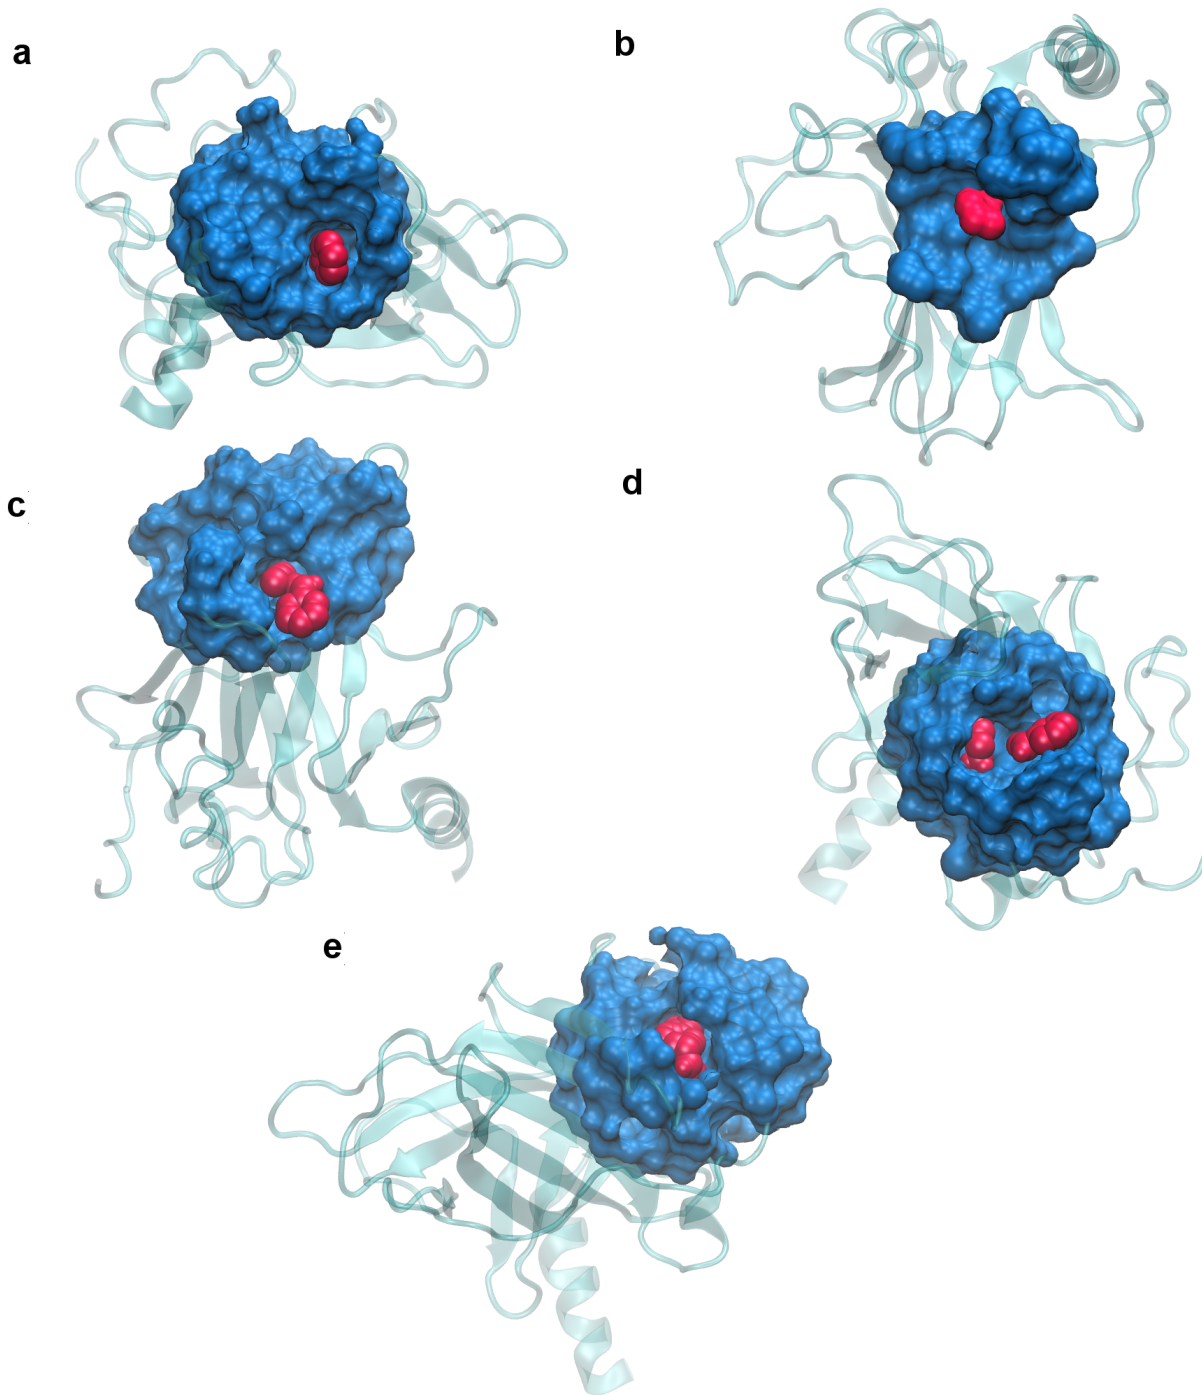

53  
54 **Supplementary Figure 7. Computationally predicted druggable sites.** a) the L1/S3  
55 pocket, b) the L1 loop back pocket, c) the Tyr220 pocket, d) the Met160 pocket, and e)  
56 the Gln192 pocket are all drawn in blue surfaces. Small organic probe molecules are  
57 shown in each pocket to highlight the cavity.  
58

59  
60

| copy1       | % interaction   | DNA counterpart   | copy2 | % interaction   | DNA counterpart   | copy3 | % interaction | DNA counterpart   |
|-------------|-----------------|-------------------|-------|-----------------|-------------------|-------|---------------|-------------------|
| p21         |                 |                   |       |                 |                   |       |               |                   |
| 370         | 19.3%           | DT1686,<br>DT1687 |       |                 |                   |       |               |                   |
| 373         | 10.5%           | DT1687,<br>DT1686 |       |                 |                   |       |               |                   |
| 379         | 29.8%           | DA1689            |       |                 |                   |       |               |                   |
| 381         | 25.0%           | DA1689            |       |                 |                   |       |               |                   |
| 382         | 17.1%           | DT1687            |       |                 |                   |       |               |                   |
| puma        |                 |                   |       |                 |                   |       |               |                   |
| 370         | 7.1%            | DA1591,<br>DC1592 | 363   | 6.9%            | DA1623            | 370   | 27.7%         | DC1685,<br>DT1686 |
| 372         | 21.5%           | DT1686            |       |                 |                   | 373   | 10.5%         | DC1685,<br>DG1684 |
| 373         | 11.3%           | DT1687            |       |                 |                   | 379   | 4.5%          | DC1685            |
| 379         | 30.5%,<br>18.6% | DA1590,<br>DC1589 |       |                 |                   | 381   | 19.2%         | DC1685,<br>DT1686 |
| 381         | 23.8%           | DA1697            |       |                 |                   |       |               |                   |
| 382         | 21.8%           | DA1591            |       |                 |                   |       |               |                   |
| nonspecific |                 |                   |       |                 |                   |       |               |                   |
|             |                 |                   | 379   | 42.6%           | DT1600            | 382   | 12.3%         | DT1665            |
|             |                 |                   | 381   | 50.8%           | DT1600,<br>DG1599 | 386   | 19.3%         | DA1622,<br>DT1666 |
|             |                 |                   | 382   | 33.9%           | DG1599            | 370   | 18.3%         | DA1622,<br>DA1621 |
|             |                 |                   | 386   | 16.6%,<br>22.7% | DG1679,<br>DG1678 | 372   | 6.1%          | DT1666            |
|             |                 |                   |       |                 |                   | 373   | 6.2%          | DG1656            |
|             |                 |                   |       |                 |                   | 363   | 8.4%          | DA1630            |
|             |                 |                   |       |                 |                   | 381   | 25.3%         | DT1688            |
|             |                 |                   |       |                 |                   | 382   | 44.2%         | DT1600            |
|             |                 |                   |       |                 |                   | 386   | 17.2%         | DT1688,<br>DG1598 |

61  
62  
63  
64  
65  
66  
67  
68

**Supplementary Table 1. Salt bridge footprint analysis.** This table lists the percentage of salt bridge interactions between the C-terminal residues and the DNA in each MD copy for the three systems. The residues highlighted in blue, green and orange are from monomers A, B and C, respectively. The DNA nucleotides that each p53 residue interacted with are shown in the DNA counterpart column.



| monomer | ResID  | p21  | puma | nonspecific |
|---------|--------|------|------|-------------|
| A       | Ala276 | 43.0 | 18.7 | 0.0         |
| B       | Ala276 | 47.8 | 0.0  | 7.4         |
| C       | Ala276 | 60.1 | 49.1 | 22.0        |
| D       | Ala276 | 28.7 | 35.4 | 8.4         |
| A       | Arg280 | 44.3 | 37.1 | 9.1         |
| B       | Arg280 | 56.7 | 40.1 | 0.0         |
| C       | Arg280 | 69.9 | 44.9 | 16.9        |
| D       | Arg280 | 35.0 | 48.0 | 11.5        |
| A       | Ser241 | 61.3 | 67.9 | 60.9        |
| B       | Ser241 | 37.4 | 55.5 | 33.9        |
| C       | Ser241 | 62.7 | 69.8 | 40.8        |
| D       | Ser241 | 49.9 | 51.5 | 39.7        |
| A       | Arg273 | 43.8 | 60.1 | 26.5        |
| B       | Arg273 | 43.5 | 32.2 | 36.0        |
| C       | Arg273 | 52.9 | 47.5 | 36.5        |
| D       | Arg273 | 53.1 | 41.1 | 21.6        |
| A       | Asn239 | 39.2 | 23.6 | 4.7         |
| B       | Asn239 | 42.0 | 19.2 | 15.0        |
| C       | Asn239 | 46.6 | 36.5 | 25.8        |
| D       | Asn239 | 29.7 | 15.8 | 6.4         |
| A       | Ser121 | 26.6 | 32.4 | 17.4        |
| B       | Ser121 | 60.1 | 90.5 | 29.0        |
| C       | Ser121 | 42.9 | 28.3 | 91.7        |
| D       | Ser121 | 19.3 | 16.2 | 15.5        |
| A       | Lys120 | 19.3 | 9.7  | 0.0         |
| B       | Lys120 | 62.6 | 5.5  | 21.1        |
| C       | Lys120 | 61.9 | 48.1 | 5.1         |
| D       | Lys120 | 0.0  | 16.0 | 0.0         |
| A       | Arg248 | 23.8 | 28.9 | 9.7         |
| B       | Arg248 | 13.5 | 7.2  | 9.8         |
| C       | Arg248 | 17.6 | 40.9 | 4.8         |
| D       | Arg248 | 16.0 | 14.5 | 38.3        |
| A       | Thr123 | 8.0  | 35.8 | 0.0         |
| B       | Thr123 | 0.0  | 0.0  | 0.0         |
| C       | Thr123 | 0.0  | 0.0  | 0.0         |
| D       | Thr123 | 0.0  | 22.1 | 29.2        |
| A       | Asn288 | 13.8 | 20.4 | 10.8        |
| B       | Asn288 | 3.5  | 22.7 | 15.9        |
| C       | Asn288 | 5.3  | 12.1 | 3.4         |
| D       | Asn288 | 0.0  | 22.6 | 7.8         |

69

70 **Supplementary Table 2. Hydrogen bond footprint analysis between the DNA and**  
71 **the fl-p53 tetramer.** The average scores of the key protein residues in the four p53  
72 monomers in each system are shown.

73

| <b>p21</b> |       |       |       |       |
|------------|-------|-------|-------|-------|
|            | monA  | monB  | monC  | monD  |
| Copy1      | 94.77 | 7.35  | 10.06 | 94.67 |
| Copy2      | 94.97 | 23.14 | 9.05  | 95.61 |
| Copy3      | 33.87 | 6.68  | 6.04  | 98.63 |

| <b>puma</b> |       |       |       |       |
|-------------|-------|-------|-------|-------|
|             | monA  | monB  | monC  | monD  |
| Copy1       | 81.66 | 10.08 | 4.77  | 99.64 |
| Copy2       | 96.78 | 8.08  | 73.45 | 96.6  |
| Copy3       | 99.64 | 16.07 | 11.03 | 97.19 |

| <b>nonspecific DNA</b> |       |       |       |       |
|------------------------|-------|-------|-------|-------|
|                        | monA  | monB  | monC  | monD  |
| Copy1                  | 95.9  | 6.33  | 11.65 | 18.62 |
| Copy2                  | 93.19 | 21.83 | 7.08  | 6.35  |
| Copy3                  | 5.54  | 13.94 | 24.57 | 91.78 |

74

75

**Supplementary Table 3. Percentage of L1/S3 pocket open conformations for each monomer during MD simulations of the three systems.**

76

77

78

79 **Supplementary Movie 1.** PC1 motion from the protein alpha carbons illustrating the C-  
80 terminal motion going from an extended to a compact conformation.

81

82 **Supplementary Movie 2.** PC1 motion of the DBD tetramer going from minimum to  
83 maximum PC1 values. Only p53 DBDs and DNA are depicted.

84

85 **Supplementary Movie 3.** PC2 motion of the DBD tetramer going from minimum to  
86 maximum PC2 values. Only p53 DBDs and DNA are depicted.

87
